# Supplementary material
Source: PubMed Central journal article supplement (PMC5683423)
Supplement: NIHMS906514-supplement-001768_-_Supplemental_Material.pdf [file NIHMS906514-supplement-001768_-_Supplemental_Material.pdf]

## **SUPPLEMENTAL MATERIAL**

### **Genetic testing methodology**

#### *Targeted HCM genetic testing*

For the panel testing performed by Partners Laboratory for Molecular Medicine, all regions in the assays were either covered by array probes (for CardioChip assays) or a minimum depth of 20x for NGS-based assays. Any base that did not meet the coverage requirements above were sequenced via Sanger sequencing.

#### *WGS*

Sequencing reads were aligned to the NCBI reference sequence (GRCh37) using the Burrows-Wheeler Aligner 0.6.1-r104. The aligned reads were sorted and PCR duplicates removed using samtools 0.1.18. Local indel realignment, base quality recalibration, and variant calling were performed with UnifiedGenotyper using Genome Analysis ToolKit (GATK) 2.2.5 and the recommended best practices by the GATK development team at the Broad Institute.

**Supplemental table. Carrier variants for recessive conditions**

| Gene   | Variant (Nucleotide) | Variant (Protein) | Disease                                       | Classification                            |
|--------|----------------------|-------------------|-----------------------------------------------|-------------------------------------------|
| ABCB4  | c.959C>T             | p.Ser320Phe       | Familial progressive intrahepatic cholestasis | Uncertain significance - Favor Pathogenic |
| ACOX1  | c.1851delT           | p.Gly618AlafsX24  | Peroxisomal acyl-CoA oxidase deficiency       | Likely Pathogenic                         |
| ASPA   | c.854A>C             | p.Glu285Ala       | Canavan disease                               | Pathogenic                                |
| ATP7B  | c.383delG            | p.Gly128GlufsX25  | Wilson disease                                | Pathogenic                                |
| AURKC  | c.94_101dup          | p.Met35AlafsX40   | Spermatogenic failure 5                       | Pathogenic                                |
| BTD    | c.1330G>C            | p.Asp444His       | Biotinidase deficiency                        | Pathogenic                                |
| BTD    | c.1330G>C            | p.Asp444His       | Biotinidase deficiency                        | Pathogenic                                |
| BTD    | c.1330G>C            | p.Asp444His       | Biotinidase deficiency                        | Pathogenic                                |
| C2     | c.841_849+19del      |                   | C2 deficiency                                 | Likely Pathogenic                         |
| CBS    | c.833T>C             | p.Ile278Thr       | Homocystinuria                                | Pathogenic                                |
| CFTR   | c.1521_1523delCTT    | p.Phe508del       | Cystic fibrosis                               | Pathogenic                                |
| CFTR   | c.1521_1523delCTT    | p.Phe508del       | Cystic fibrosis                               | Pathogenic                                |
| CRTAP  | c.471+2C>A           |                   | Osteogenesis imperfecta type II               | Pathogenic                                |
| DNAH11 | c.7508_7509insTTG    | p.Lys2504X        | Primary ciliary dyskinesia                    | Pathogenic                                |
| ESCO2  | c.294_297del         | p.Arg99SerfsX2    | Roberts syndrome                              | Pathogenic                                |
| EYS    | c.6416G>A            | p.Cys2139Tyr      | Retinitis pigmentosa                          | Uncertain significance - Favor Pathogenic |
| GJB2   | c.109G>A             | p.Val37Ile        | Hearing loss                                  | Pathogenic                                |
| GJB2   | c.167del             | p.Leu56ArgfsX     | Nonsyndromic hearing loss                     | Pathogenic                                |
| GJB2   | c.109G>A             | p.Val37Ile        | Nonsyndromic hearing loss                     | Pathogenic                                |
| GPR56  | c.10C>T              | p.Gln4X           | Bilateral frontoparietal polymicrogyria       | Pathogenic                                |
| HEXA   | c.745C>T             | p.Arg249Trp       | HEXA pseudodeficiency                         | Pseudodeficiency allele                   |
| HFE    | c.845G>A             | p.Cys282Tyr       | Hereditary hemochromatosis                    | Pathogenic                                |
| HFE    | c.187C>G             | p.His63Asp        | Hereditary Hemochromatosis                    | Pathogenic                                |
| HFE    | c.187C>G             | p.His63Asp        | Hereditary hemochromatosis                    | Pathogenic                                |
| HFE    | c.845G>A             | p.Cys282Tyr       | Hereditary hemochromatosis                    | Pathogenic                                |
| HFE    | c.187C>G             | p.His63Asp        | Hereditary hemochromatosis                    | Pathogenic                                |
| HFE    | c.187C>G             | p.His63Asp        | Hereditary                                    | Pathogenic                                |

|        |                |                   |                                                  |                   |
|--------|----------------|-------------------|--------------------------------------------------|-------------------|
|        |                |                   | hemochromatosis                                  |                   |
| HFE    | c.187C>G       | p.His63Asp        | Hereditary hemochromatosis                       | Pathogenic        |
| HFE    | c.187C>G       | p.His63Asp        | Hereditary hemochromatosis                       | Pathogenic        |
| HFE    | c.187C>G       | p.His63Asp        | Hereditary hemochromatosis                       | Pathogenic        |
| HFE    | c.187C>G       | p.His63Asp        | Hereditary hemochromatosis                       | Pathogenic        |
| HFE    | c.187C>G       | p.His63Asp        | Hereditary hemochromatosis                       | Pathogenic        |
| HFE    | c.845G>A       | p.Cys282Tyr       | Hereditary hemochromatosis                       | Pathogenic        |
| HFE    | c.187C>G       | p.His63Asp        | Hereditary hemochromatosis                       | Pathogenic        |
| HFE    | c.187C>G       | p.His63Asp        | Hereditary hemochromatosis                       | Pathogenic        |
| HFE    | c.187C>G       | p.His63Asp        | Hereditary hemochromatosis                       | Pathogenic        |
| HFE    | c.187C>G       | p.His63Asp        | Hereditary hemochromatosis                       | Pathogenic        |
| HFE2   | c.959G>T       | p.Gly320Val       | Hemochromatosis type 2                           | Pathogenic        |
| IFT172 | c.112C>T       | p.Arg38X          | Short-rib thoracic dysplasia                     | Likely Pathogenic |
| LAMA2  | c.5563-2A>G    |                   | Congenital muscular dystrophy type 1A            | Likely Pathogenic |
| LIFR   | c.2074C>T      | p.Arg692X         | Stuve-Wiedemann syndrome                         | Likely Pathogenic |
| LIPA   | c.253C>T       | p.Gln85X          | Lysosomal acid lipase A deficiency               | Pathogenic        |
| LOXHD1 | c.4714C>T      | p.Arg1572X        | Nonsyndromic hearing loss                        | Pathogenic        |
| LOXHD1 | c.4480C>T      | p.Arg1494X        | Hearing loss                                     | Pathogenic        |
| LTBP4  | c.254delT      | p.Leu85ArgfsX15   | Cutis laxa, autosomal recessive, type IC         | Pathogenic        |
| MMAB   | c.700C>T       | p.Gln234X         | Methylmalonic acidemia                           | Likely Pathogenic |
| MUTYH  | c.536A>G       | p.Tyr179Cys       | MUTYH-associated polyposis                       | Pathogenic        |
| MUTYH  | c.934-2A>G     |                   | MUTYH-associated polyposis                       | Likely Pathogenic |
| MYH2   | c.3002delA     | p.Glu1001GlyfsX26 | Myopathy with external ophthalmoplegia           | Likely Pathogenic |
| MYO7A  | c.5648G>A      | p.Arg1883Gln      | Usher syndrome type I                            | Likely Pathogenic |
| NPHS2  | c.868G>A       | p.Val290Met       | Idiopathic steroid-resistant nephrotic syndrome, | Likely Pathogenic |
| PAH    | c.842+5G>A     | p.(?)             | Phenylketonuria (PKU)                            | Likely Pathogenic |
| PARK2  | c.1289G>A      | p.Gly430Asp       | Parkinson disease                                | Likely Pathogenic |
| PHYH   | c.766_767delGT | p.Val256PhefsX14  | Refsum disease                                   | Likely Pathogenic |

|          |                  |                  |                                                                                    |                                             |
|----------|------------------|------------------|------------------------------------------------------------------------------------|---------------------------------------------|
| PINK1    | c.620del         | p.Arg207Glnfs*14 | Parkinson disease                                                                  | Likely Pathogenic                           |
| POLG     | c.2209G>C        | p.Gly737Arg      | POLG-related mitochondrial disorder                                                | Uncertain significance:<br>Favor pathogenic |
| PRX      | c.2289delT       | p.Asp765ThrfsX10 | Charcot-Marie-Tooth disease type 4F                                                | Likely Pathogenic                           |
| RAPSN    | c.264C>A         | p.Asn88Lys       | Congenital myasthenic syndrome                                                     | Pathogenic                                  |
| SERAC1   | c.262_265dupCATG | p.Gly89AlafsX32  | 3-methylglutaconic aciduria with deafness, encephalopathy, and Leigh-like syndrome | Likely Pathogenic                           |
| SERPINA1 | c.1096G>A        | p.Glu366Lys      | Alpha-1 Antitrypsin Deficiency Disorder                                            | Pathogenic                                  |
| SGCG     | c.525delT        | p.Leu85ArgfsX15  | Limb girdle muscular dystrophy type 2C                                             | Pathogenic                                  |
| SLC12A3  | c.2221G>A        | p.Gly741Arg      | Gitelman syndrome                                                                  | Uncertain significance:<br>Favor pathogenic |
| SLC26A4  | c.1003T>C        | p.Phe335Leu      | DFNB4/Pendred syndrome                                                             | Likely Pathogenic                           |
| SLC35C1  | c.464_466del     | p.Phe155del      | Congenital disorder of glycosylation, type lic                                     | Likely Pathogenic                           |
| SLC52A2  | c.916G>A         | p.Gly306Arg      | Brown-Vialetto-Van Laere syndrome                                                  | Pathogenic                                  |
| SPG11    | c.1951C>T        | p.Arg651X        | Spastic paraplegia                                                                 | Pathogenic                                  |
| TALDO1   | c.516dupC        | p.Ala173ArgfsX23 | Transaldolase deficiency                                                           | Pathogenic                                  |
| TCIRG1   | c.1674-1G>A      |                  | Infantile malignant osteopetrosis                                                  | Pathogenic                                  |
| TCTN2    | c.1877T>A        | p.Leu626X        | Joubert syndrome                                                                   | Pathogenic                                  |
| TMCO1    | c.240_243delGGTT | p.Val81ThrfsX9   | Cerebrofaciothoracic dysplasia                                                     | Pathogenic                                  |
| TMEM5    | c.1018C>T        | p.Arg340X        | Congenital muscular dystrophy-dystrophoglycanopathy with brain and eye anomalies   | Pathogenic                                  |
| TRDN     | c.613C>T         | p.Gln205X        | Catecholaminergic polymorphic ventricular tachycardia                              | Likely Pathogenic                           |
| TREX1    | c.341G>A         | p.Arg114His      | Aicardi-Goutieres syndrome                                                         | Pathogenic                                  |
| TSHR     | c.545+2_545+3del |                  | Hypothyroidism                                                                     | Likely Pathogenic                           |
| TTC8     | c.489G>A         | p.Thr163Thr      | Bardet Biedl syndrome                                                              | Uncertain significance:<br>Favor pathogenic |
| TYR      | c.1118C>A        | p.Thr373Lys      | Oculocutaneous albinism type 1                                                     | Pathogenic                                  |
| TYRP1    | c.1057_1060del   | p.Asn353ValfsX31 | Oculocutaneous albinism                                                            | Pathogenic                                  |

|       |            |             |                                    |            |
|-------|------------|-------------|------------------------------------|------------|
|       |            |             | type III                           |            |
| USH2A | c.1214delA | p.Asn405fs  | Usher syndrome type II             | Pathogenic |
| VWF   | c.2561G>A  | p.Arg854Gln | von Willebrand disease type<br>2 N | Pathogenic |

\*Members of the MedSeq Project are as follows:

David W. Bates, MD, Carrie Blout, MS, CGC, Kurt D. Christensen, PhD, Allison L. Cirino, MS, Robert C. Green, MD, MPH, Carolyn Y. Ho, MD, Lily Hoffman-Andrews, Joel B. Krier, MD, William J. Lane, MD, PhD, Lisa S. Lehmann, MD, PhD, MSc, Calum A. MacRae, MD, PhD, Cynthia C. Morton, PhD, Denise L. Perry, MS, Christine E. Seidman, MD, Shamil R. Sunyaev, PhD, Jason L. Vassy, MD, MPH, SM, Erica Schonman, MPH, Rebecca Walsh, Eleanor Steffens, Wendi Nicole Betting, Brigham and Women's Hospital and Harvard Medical School; Samuel J. Aronson, ALM, MA, Ozge Ceyhan-Birsoy, PhD, Matthew S. Lebo, PhD, Kalotina Machini, PhD, MS, Heather M. McLaughlin, PhD, Danielle R. Azzariti, MS, Heidi L. Rehm, PhD, Ellen A. Tsai, PhD, Partners Healthcare Personalized Medicine; Jennifer Blumenthal-Barby, PhD, Lindsay Z. Feuerman, Amy L. McGuire, JD, PhD, Kaitlyn Lee, Jill O. Robinson, MA, Melody J. Slashinski, MPH, PhD, Baylor College of Medicine, Center for Medical Ethics and Health Policy; Pamela M. Diamond, PhD, University of Texas Houston School of Public Health; Kelly Davis, Peter A. Ubel, MD, Duke University; Peter Kraft, PhD, Harvard School of Public Health; J. Scott Roberts, PhD, University of Michigan; Judy E. Garber, MD, MPH, Dana-Farber Cancer Institute; Tina Hambuch, PhD, Illumina, Inc.; Michael F. Murray, MD, Geisinger Health System; Isaac Kohane, MD, PhD, Sek Won Kong, MD, Boston Children's Hospital.
